# Supplementary material
Source: publisher figshare collection journal article supplement (https://tandf.figshare.com/ndownloader/files/18155048)
Supplement: Supplementary file 1 [file 18155048]

**Supporting information**

**Core-shell Structured Catalyst of HZSM-5 Zeolite Supported on Stainless Steel Fiber for Methanol-to-Aromatics**

Meng Zhanga, Yuehua Fanga, Fan Yanga, Xuedong Zhu a*.

*a Engineering Research Center of Large Scale Reactor Engineering and Technology, Ministry of Education, East China University of Science and Technology, Shanghai, China*

[*Corresponding author: Xuedong Zhu.HYPERLINK "mailto:*Corresponding%20author:%20Xuedong%20Zhu.%20E-mail%20address:%20xdzhu@ecust.edu.cn" HYPERLINK "mailto:*Corresponding%20author:%20Xuedong%20Zhu.%20E-mail%20address:%20xdzhu@ecust.edu.cn"E-mail address: xdzhu@ecust.edu.cn](mailto:*Corresponding%20author:%20Xuedong%20Zhu.%20E-mail%20address:%20xdzhu@ecust.edu.cn). Address: East China University of Science and Technology, 130 Meilong Road, Xuhui District, Shanghai, China.

**Fig S1.** BJH pore size distributions of C-Z/ss-fiber

The corresponding pore-size-distribution was deduced form the adsorption to avoid artifact provoked by possible tensile-strength-effect.

(Due to the space limitation of the manuscript, the Fig S1 was not shown in revised paper.)
